# Supplementary material for: Thiourea-Isocyanate-Based Covalent Organic Frameworks with Tunable Surface Charge and Surface Area for Methylene Blue and Methyl Orange Removal from Aqueous Media
Source: MDPI journal article supplement (doi:10.3390/mi13060938), 2022-06-13
Supplement: s1 [file s1]

## Absorption isotherm models

According to the linear and nonlinear Langmuir model, it was assumed that the adsorption energy is uniform and there is no adsorbate migration in the surface plane [1,2], and is expressed as in Eq (1) and (2):

$$C_e/q_e = 1/q_m K_L + C_e/q_m \quad (1)$$

$$q_e = q_m K_L C_e / (1 + K_L C_e) \quad (2)$$

where, “ $q_e$ ” is the amount of solute adsorbed per unit weight of adsorbent at equilibrium (mg/g), “ $C_e$ ” is the equilibrium concentration of the solute in bulk solution (mg/L), “ $q_m$ ” is the maximum adsorption capacity (mg/g), and  $K_L$  is the Langmuir constant (L/mg).

The linear and nonlinear Freundlich models assumes heterogeneous surface energies and it becomes more heterogeneous as the value of the slope approaches zero [2-4]. Freundlich equation can be also written as Eq (3) and (4):

$$\ln q_e = \ln K_F + 1/n \ln C_e \quad (3)$$

$$q_e = K_F C_e^{1/n} \quad (4)$$

where, “ $K_F$ ” is a constant indicative of the relative adsorption capacity of the adsorbent ( $\text{mg}^{1-(1/n)} \text{L}^{1/n} / \text{g}$ ) and “ $n$ ” is a constant indicative of the intensity of the adsorption, and “ $C_e$ ” is the equilibrium concentration of the solute in bulk solution (mg/L).

According to the Temkin model, it was assumed that the adsorption heat of all molecules in the layer decreases linearly with the coverage area due to the adsorbent-adsorbate interactions and the adsorption is characterized by a homogeneous distribution of binding energies up to a maximum binding energy [5]. Equation can be written as follows Eq. (5):

$$q_e = RT/b \ln K_T + RT/b \ln C_e \quad (5)$$

where “ $q_e$ ” is the amount of solute adsorbed per unit weight of adsorbent at equilibrium (mg/g), “ $RT/b = B$ ”, “ $R$ ” is the gas constant (8.314 J/mol K), “ $T$ ” is the absolute temperature in Kelvin unit, “ $b$ ” is related to the heat of adsorption (J/mol), “ $K_T$ ” is the Temkin constant (L/mg), and “ $C_e$ ” the equilibrium concentration of the solute in bulk solution (mg/L).

The Elovich model is based on a kinetic principle, which is assumed to increase exponentially by adsorption regions, which indicates a multi-layer adsorption [4]. The equation of Elovich isotherm is as follows Eq. (6):

$$\ln(q_e/C_e) = \ln(K_E q_m) - 1/q_m q_e \quad (6)$$

where, “ $q_e$ ” is the amount of solute adsorbed per unit weight of adsorbent at equilibrium (mg/g), “ $C_e$ ” is the equilibrium concentration of the solute in bulk solution (mg/L), “ $q_m$ ” is the maximum adsorption capacity (mg/g), and  $K_E$  is the Elovich constant (L/mg).

Dubinin-Radushkevich isotherm model is generally applied to express the adsorption mechanism on heterogeneous surfaces [6]. It is expressed by Eq. (7):

$$\ln q_e = \ln q_m - B \varepsilon^2 \quad (7)$$

where “ $q_m$ ” represents the adsorption capacity (mg/g), “ $R$ ” is the gas constant (8.314 J/molK), and “ $T$ ” refers to the temperature as Kelvin. In addition,  $\varepsilon^2$  value is given by  $\varepsilon^2 = (RT \ln(1 + 1/C_e))^2$  equation.

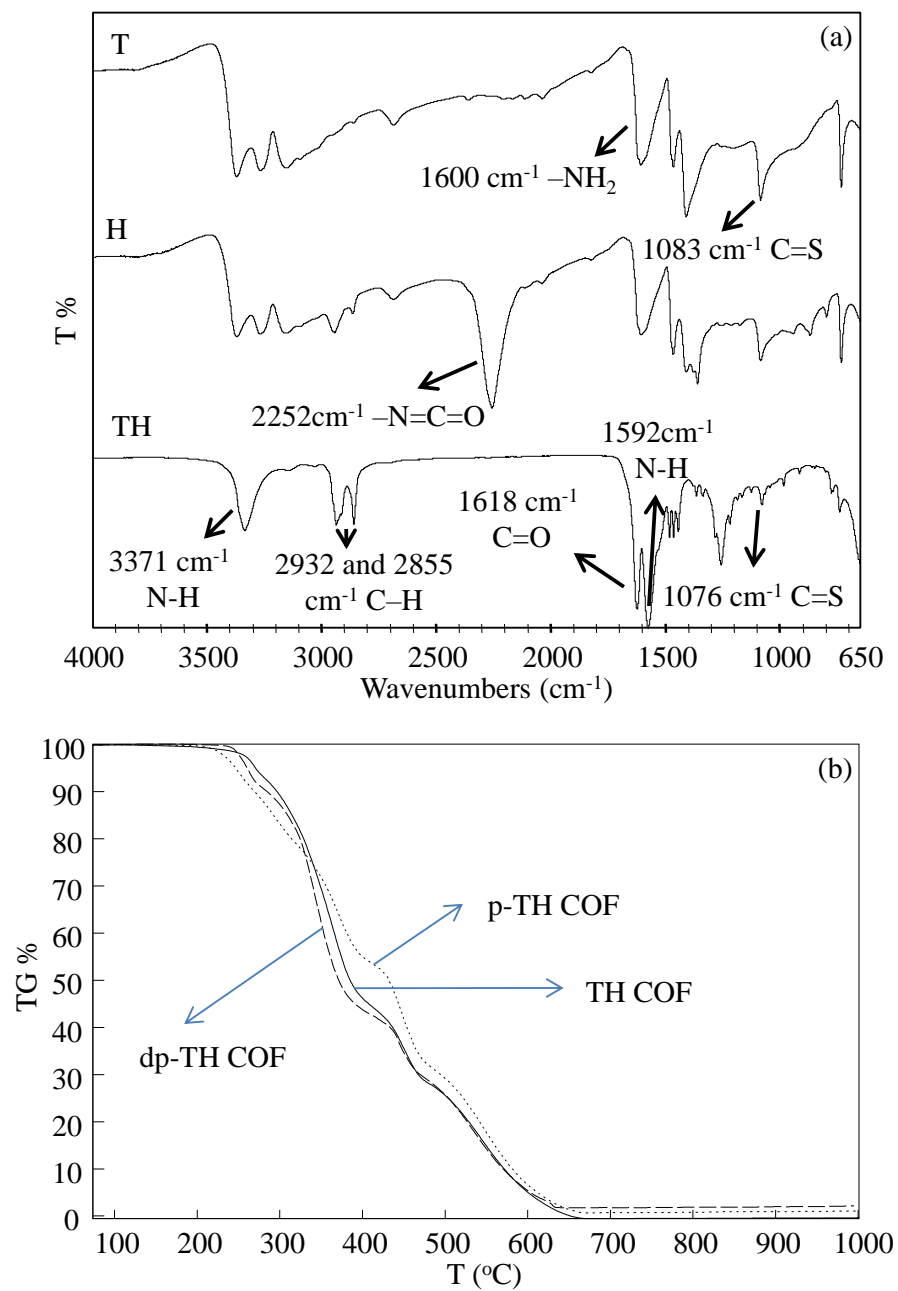

**Figure S1.** (a) FT-IR spectra and (b) TGA thermograms of TH based COFs.

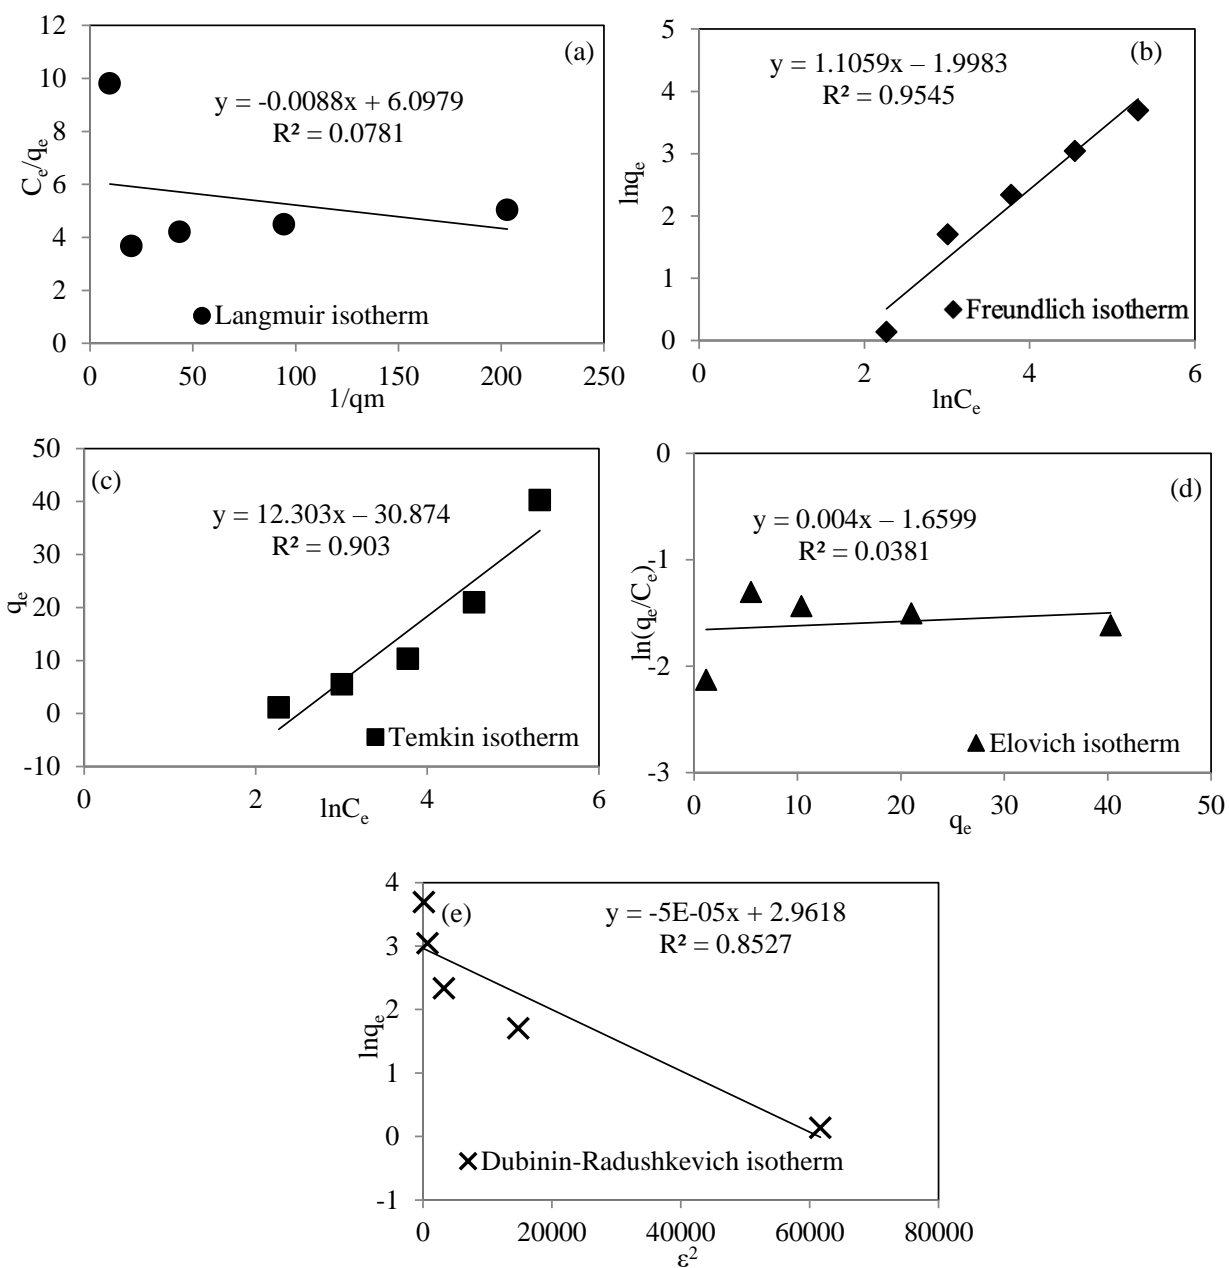

**Figure S2.** The (a) Langmuir, (b) Freundlich, (c) Temkin, (d) Elovich, and (e) Dubinin-Radushkevich isotherms for MB absorption by dp-TH COFs.

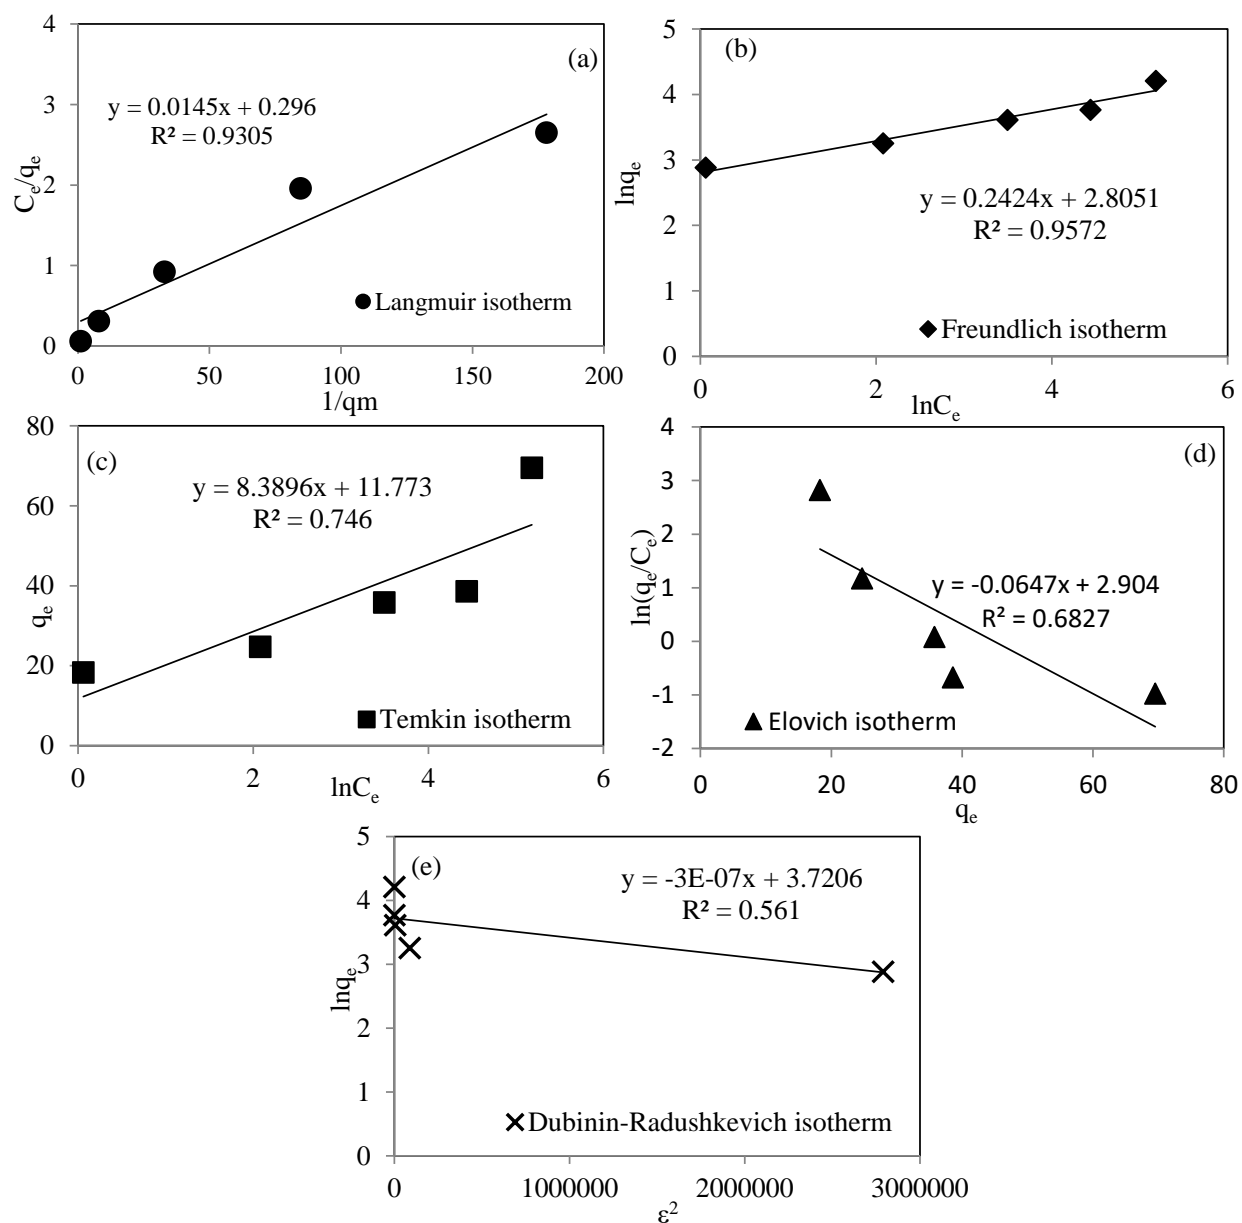

**Figure S3.** The (a) Langmuir, (b) Freundlich, (c) Temkin, (d) Elovich, and (e) Dubinin-Radushkevich for MO adsorption by p-TH COFs.

**Table S1.** Equilibrium pH values of 25 ppm 100 mL of MB and MO solutions at the end of absorption process by using TH, dp-TH, and p-TH COFs as absorbents and without absorbent.

| Dye | pH values         |         |           |          |
|-----|-------------------|---------|-----------|----------|
|     | Without absorbent | TH COF  | dp-TH COF | p-TH COF |
| MB  | 6.2±0.3           | 6.6±0.1 | 8.7±0.3   | -        |
| MO  | 6.7±0.1           | 7.5±0.2 | -         | 3.8±0.2  |

**Table S2.** Various isotherm constants for absorption of MB and MO dyes by dp-TH, and p-TH COFs, respectively.

| Isotherm model         | Isotherm constants |                                                                 |                                |       | Situation  |
|------------------------|--------------------|-----------------------------------------------------------------|--------------------------------|-------|------------|
| Langmuir (Linear)      | Dye                | $K_L$<br>(L/mg)                                                 | $q_m$<br>(mg/g)                | $R^2$ |            |
|                        | MB                 | $1 \times 10^{-3}$                                              | 113.6                          | 0.078 | Not fit    |
|                        | MO                 | $2 \times 10^{-3}$                                              | 68.9                           | 0.930 | Not fit    |
| Langmuir (Nonlinear)   | MB                 | $9 \times 10^{-4}$                                              | 98.6                           | 0.098 | Not fit    |
|                        | MO                 | $2 \times 10^{-1}$                                              | 72.2                           | 0.942 | Not fit    |
| Freundlich (Linear)    | Dye                | $K_F$<br>( $\text{mg}^{1-(1/n)} \text{L}^{1/n} \text{g}^{-1}$ ) | $n$                            | $R^2$ |            |
|                        | MB                 | $1 \times 10^{-1}$                                              | 0.91                           | 0.954 | Not fit    |
|                        | MO                 | 16.5                                                            | 4.12                           | 0.957 | Not fit    |
| Freundlich (Nonlinear) | MB                 | $3 \times 10^{-1}$                                              | 1.01                           | 0.998 | <b>Fit</b> |
|                        | MO                 | 17.5                                                            | 3.83                           | 0.998 | <b>Fit</b> |
| Temkin                 | Dye                | $K_T$<br>(L/mg)                                                 | $B$<br>(kJ mol <sup>-1</sup> ) | $R^2$ |            |
|                        | MB                 | $8 \times 10^{-2}$                                              | 204.8                          | 0.903 | Not fit    |
|                        | MO                 | 4.06                                                            | 300.3                          | 0.746 | Not fit    |
| Elovich                | Dye                | $K_E$<br>(L/mg)                                                 | $Q_m$<br>(mg/g)                | $R^2$ |            |
|                        | MB                 | $8 \times 10^{-4}$                                              | 250                            | 0.038 | Not fit    |
|                        | MO                 | 1.18                                                            | 15.4                           | 0.683 | Not fit    |
| Dubinin-Radushkevich   | Dye                | $B$<br>(mol <sup>2</sup> /kJ <sup>2</sup> )                     | $Q_m$<br>(mg/g)                | $R^2$ |            |
|                        | MB                 | $5 \times 10^{-5}$                                              | 19.3                           | 0.853 | Not fit    |
|                        | MO                 | $3 \times 10^{-7}$                                              | 41.3                           | 0.561 | Not fit    |



## References

1. Weber, T.W.; Chakravorti, R.K. Pore and solid diffusion models for fixed-bed adsorbers. *AIChE J.* **1974**, *20*, 228–238. <https://doi.org/10.1002/aic.690200204>.
2. Habeeb, O.A.; Ramesh, K.; Ali, G.A.M.; Yunus, R.M.; Olalere, O.A. Kinetic, Isotherm and Equilibrium Study of Adsorption Capacity of Hydrogen Sulfide-Wastewater System Using Modified Eggshells. *IJUM Eng. J.* **2017**, *18*, 13–25. <https://doi.org/10.31436/iiuj.v18i1.689>.
3. Halsey, G.D. The role of heterogeneity in adsorption and catalysis. *Discuss. Faraday Soc.* **1950**, *8*, 54. <https://doi.org/10.1039/df9500800054>.
4. Hamdaoui, O.; Naffrechoux, E. Modeling of adsorption isotherms of phenol and chlorophenols onto granular activated carbon. Part I. Two-parameter models and equations allowing determination of thermodynamic parameters. *J. Hazard. Mater.* **2007**, *147*, 381–394. <https://doi.org/10.1016/j.jhazmat.2007.01.021>.
5. Hosseini, M.; Mertens, S.F.; Ghorbani, M.; Arshadi, M.R. Asymmetrical Schiff bases as inhibitors of mild steel corrosion in sulphuric acid media. *Mater. Chem. Phys.* **2003**, *78*, 800–808. [https://doi.org/10.1016/S0254-0584\(02\)00390-5](https://doi.org/10.1016/S0254-0584(02)00390-5).
6. Günay, A.; Arslankaya, E.; Tosun, İ. Lead removal from aqueous solution by natural and pretreated clinoptilolite: Adsorption equilibrium and kinetics. *J. Hazard. Mater.* **2007**, *146*, 362–371. <https://doi.org/10.1016/j.jhazmat.2006.12.034>.
